# Supplementary material
Source: publisher figshare collection journal article supplement (https://gsapubs.figshare.com/ndownloader/files/23293790)
Supplement: Supplementary file 1 [file 23293790]

A. 15Ma560A

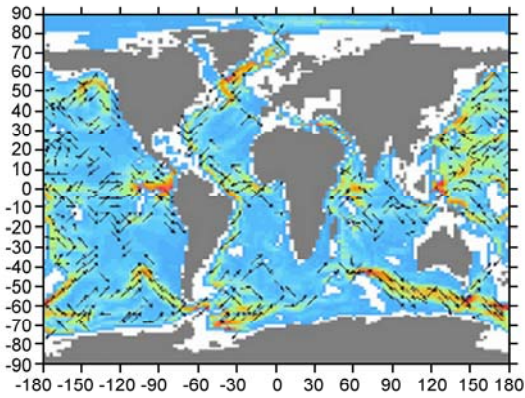

B. 15Ma700A

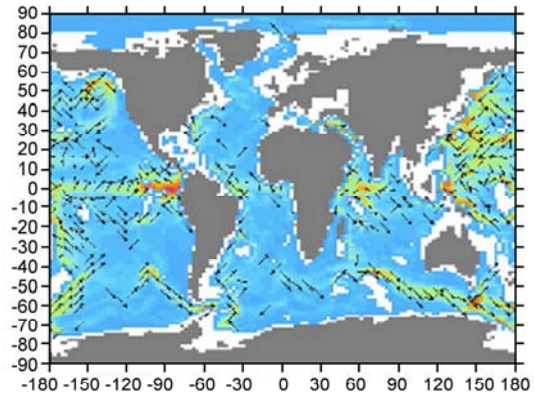

C. 15Ma560

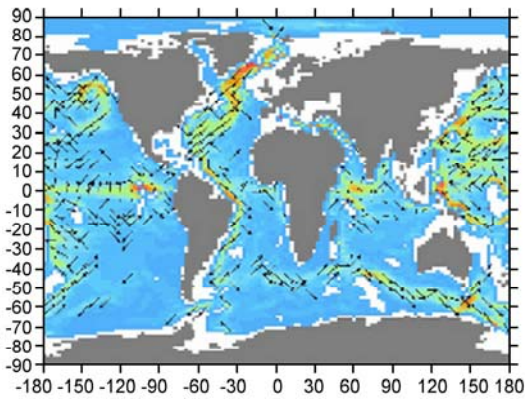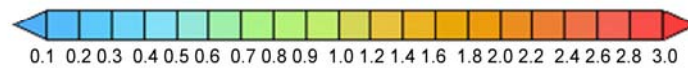

**Figure DR1.** 2500 m depth current speed as modelled in experiments A. 15Ma560A; B. 15Ma700A and C. 15Ma560.

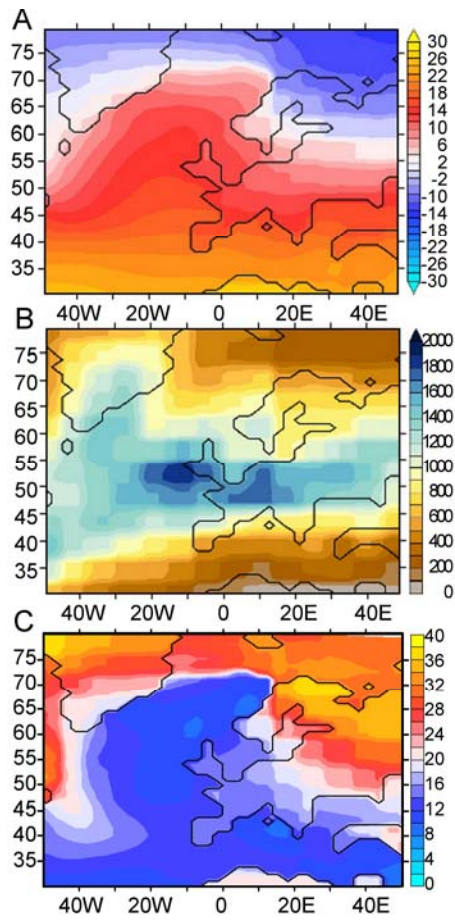

**Figure DR2.** A. Mean annual surface air temperature (°C), B. Mean annual precipitation (mm), C. Annual temperature range (°C) in Europe for experiment 15Ma560.
